# Supplementary material for: Mechanically strong, transparent, and biodegradable wood-derived film
Source: Royal Society of Chemistry journal article supplement (doi:10.1039/d1qm00973g), 2021-01-01
Supplement: d1qm00973g1.pdf [file d1qm00973g1.pdf]

## Supporting information

### **Mechanically Strong, Transparent, and Biodegradable Wood-derived Film**

Hao Sun<sup>a</sup>, Tong Ji<sup>a</sup>, Xinyuan Zhou<sup>a</sup>, Hongjie Bi<sup>a</sup>, Min Xu<sup>a, \*</sup>, Zhenhua Huang<sup>b</sup>, Liping Cai<sup>b, c</sup>

<sup>a</sup> Key Laboratory of Bio-Based Material Science and Technology, Ministry of Education, Material Science and Engineering College, Northeast Forestry University, No. 26 Hexing Road, Xiangfang District, Harbin 150040, P.R. China

<sup>b</sup> Department of Mechanical Engineering, University of North Texas, 3940 N. Elm St., Denton, TX 76207, United States

<sup>c</sup> College of Materials Science and Engineering, Nanjing Forestry University, No. 159 Longpan Road, Xuanwu District, Nanjing 210037, P.R. China

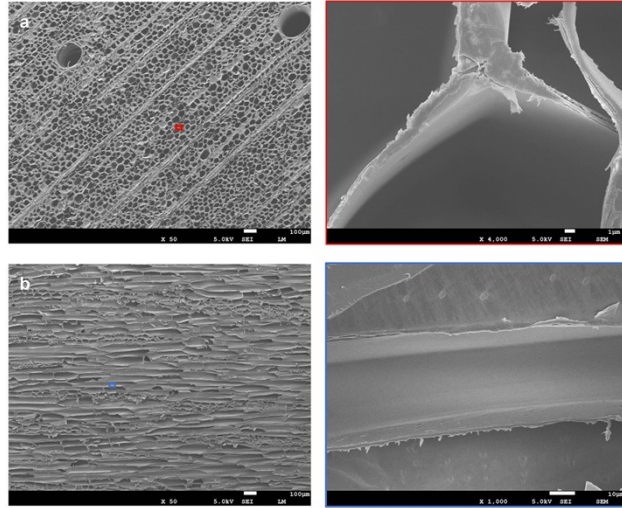

Figure S1. Microstructure characterization of natural balsa.

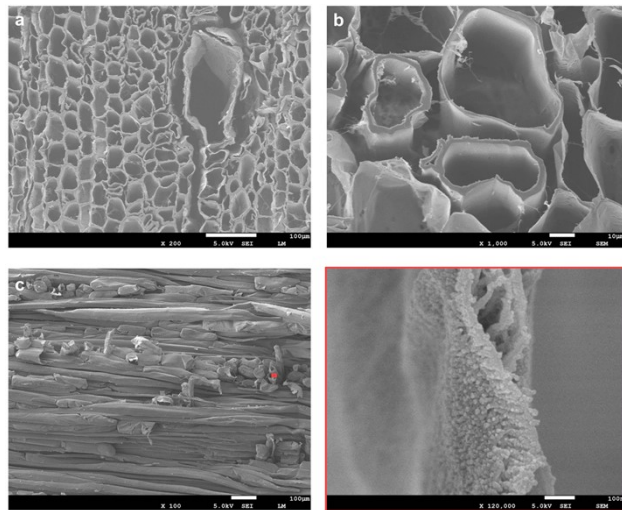

Figure S2. Microstructure characterization of TEMPO-oxidized wood.

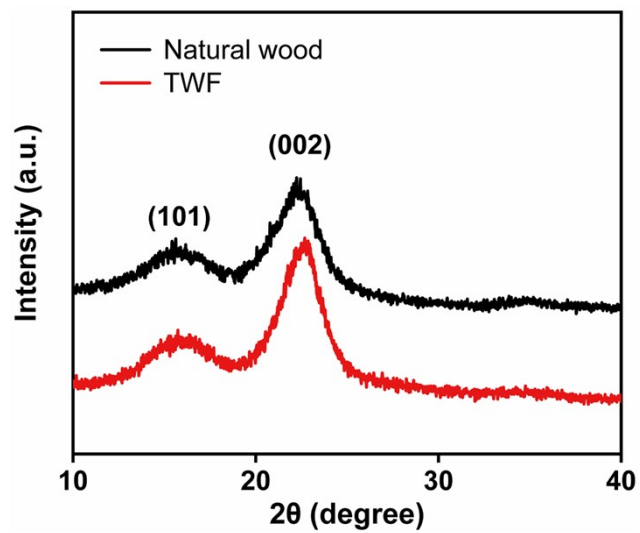

Figure S3. XRD patterns of natural wood and TWF.

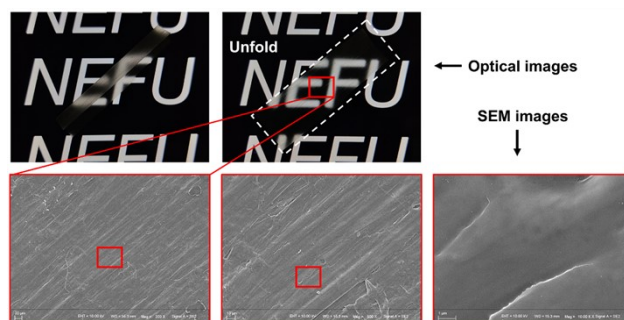

Figure S4. SEM images of TWF (a) before and (b) after bending.

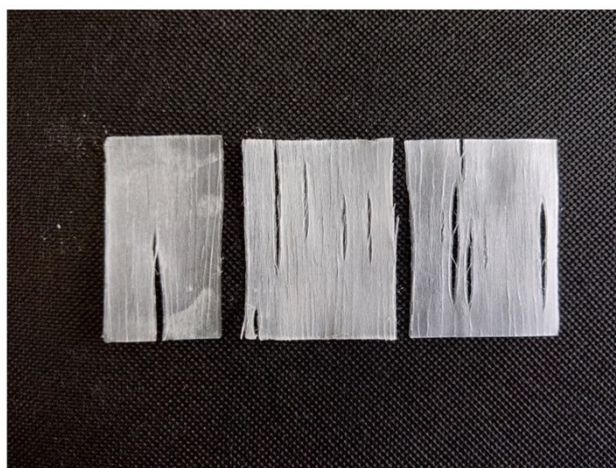

Figure S5. Photograph of TEMPO-oxidated wood dried under air condition.

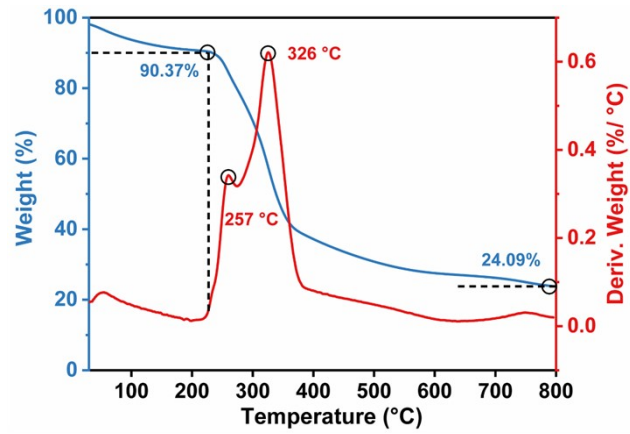

Figure S6. TGA curves of TWF.

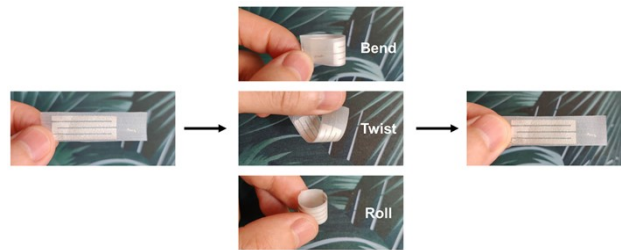

Figure S7. Optical images of TWF-based electronics after bending, twisting, and rolling to demonstrate the flexibility, durability, and dimensional stability.

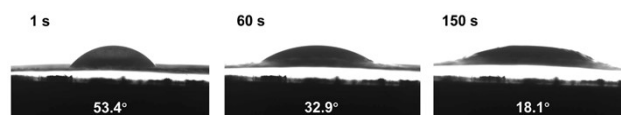

Figure S8. Water contact angle of TWF.

Table S1: Comparison of characteristics between the TWF and similar wood-derived competing materials.

| Materials        | Preparation method                                                                   | Tensile strength (MPa) |             | Transmittance (%) | Haze (%)    | Applications                                       | Ref.             |
|------------------|--------------------------------------------------------------------------------------|------------------------|-------------|-------------------|-------------|----------------------------------------------------|------------------|
|                  |                                                                                      | L                      | T           |                   |             |                                                    |                  |
| <b>TWF</b>       | <b>Delignification, TEMPO-oxidation, Ca<sup>2+</sup> cross-linking, and pressing</b> | <b>426</b>             | <b>67.1</b> | <b>77</b>         | <b>73.5</b> | <b>Substrate materials and humidity monitoring</b> | <b>This work</b> |
| TWF              | Delignification and pressing                                                         | 350                    | 23          | 88                | 74          | Substrate materials                                | 34               |
| TWF              | Delignification, alkali treatment, and pressing                                      | 469.9                  | 128.5       | 80                | 85          | Substrate materials                                | 15               |
| Wood film        | Delignification, alkali treatment, and pressing                                      | 394                    | 76          | -                 | -           | Substrate materials                                | 32               |
| Cellulose film   | Delignification, alkali treatment, and pressing                                      | 352                    | 56          | -                 | -           | Substrate materials                                | 38               |
| Transparent wood | Delignification and impregnation                                                     | 42                     | -           | 80                | 45          | Substrate materials                                | 48               |
| Transparent wood | Delignification and impregnation                                                     | 60                     | 22          | 81                | -           | Substrate materials                                | 49               |
